# Supplementary material for: Vitamin E and Multiple Health Outcomes: An Umbrella Review of Meta-Analyses
Source: MDPI journal article supplement (doi:10.3390/nu15153301), 2023-07-25
Supplement: s1 [file s1]

Supplementary Table S5. GRADE classification of quality of evidence of all included meta-analyses.

| Outcome                                                                                   | Author   | Year | Type of included studies      | Risk of bias | Inconsistency | Indirectness | Imprecision  | Publication bias   | Magnitude of effect | Plausible confounding | Dose-response | Quality          |
|-------------------------------------------------------------------------------------------|----------|------|-------------------------------|--------------|---------------|--------------|--------------|--------------------|---------------------|-----------------------|---------------|------------------|
| Supplemental vitamin E                                                                    |          |      |                               |              |               |              |              |                    |                     |                       |               |                  |
| Adult patients with non-alcoholic fatty liver disease (NAFLD): alanine aminotransferase   | Vadarlis | 2021 | RCT                           | Serious      | Not serious   | Not serious  | Very serious | Undetected         | No                  | No                    | No            | ⊕○○○<br>Very low |
| Adult patients with non-alcoholic fatty liver disease (NAFLD): aspartate aminotransferase | Vadarlis | 2021 | RCT                           | Serious      | Not serious   | Not serious  | Very serious | Strongly suspected | No                  | No                    | No            | ⊕○○○<br>Very low |
| Age-related cataract                                                                      | Zhang    | 2015 | Cohort, RCT, Case-control     | Serious      | Very serious  | Not serious  | Serious      | Undetected         | No                  | No                    | No            | ⊕○○○<br>Very low |
| ApoA                                                                                      | Hamedi   | 2021 | RCT                           | Serious      | Very serious  | Not serious  | Very serious | Undetected         | No                  | No                    | No            | ⊕○○○<br>Very low |
| ApoB                                                                                      | Hamedi   | 2021 | RCT                           | Serious      | Very serious  | Not serious  | Very serious | Undetected         | No                  | No                    | No            | ⊕○○○<br>Very low |
| Asthma or wheeze in children                                                              | Wu       | 2018 | Case-control, Cross-sectional | Serious      | Not serious   | Not serious  | Serious      | Strongly suspected | No                  | No                    | No            | ⊕○○○<br>Very low |
| Asthma or wheeze in children                                                              | Wu       | 2018 | Cohort                        | Serious      | Very serious  | Not serious  | Serious      | Strongly suspected | No                  | No                    | No            | ⊕○○○<br>Very low |
| Asthma or wheeze in children                                                              | Wu       | 2018 | Cohort                        | Serious      | Very serious  | Not serious  | Serious      | Undetected         | No                  | No                    | No            | ⊕○○○<br>Very low |
| Bladder cancer                                                                            | Chen     | 2015 | Cohort, Case-control          | Serious      | Not serious   | Not serious  | Serious      | Undetected         | No                  | No                    | Yes           | ⊕⊕⊕○<br>Moderate |
| BMI                                                                                       | Emami    | 2021 | RCT                           | Serious      | Not serious   | Not serious  | Very serious | Undetected         | No                  | No                    | Yes           | ⊕⊕○○<br>Low      |
| Cardiovascular mortality                                                                  | Jayedi   | 2019 | Cohort                        | Serious      | Very serious  | Not serious  | Serious      | Undetected         | No                  | No                    | Yes           | ⊕○○○             |

|                                                                                        |           |      |     |         |              |             |              |                    |    |    |     |                  |          |
|----------------------------------------------------------------------------------------|-----------|------|-----|---------|--------------|-------------|--------------|--------------------|----|----|-----|------------------|----------|
|                                                                                        |           |      |     |         |              |             |              |                    |    |    |     |                  | Very low |
| Chemotherapy-induced peripheral neuropathy (CIPN)                                      | Chen      | 2021 | RCT | Serious | Very serious | Not serious | Very serious | Strongly suspected | No | No | No  | ⊕○○○<br>Very low |          |
| Contrast-induced acute kidney injury                                                   | Cho       | 2017 | RCT | Serious | Not serious  | Not serious | Very serious | Strongly suspected | No | No | No  | ⊕○○○<br>Very low |          |
| Diastolic blood pressure                                                               | Emami     | 2019 | RCT | Serious | Very serious | Not serious | Very serious | Undetected         | No | No | Yes | ⊕○○○<br>Very low |          |
| Duration of mastalgia                                                                  | Hajizadeh | 2019 | RCT | Serious | Not serious  | Not serious | Very serious | Undetected         | No | No | No  | ⊕○○○<br>Very low |          |
| Endothelial function                                                                   | Siervo    | 2015 | RCT | Serious | Very serious | Not serious | Serious      | Undetected         | No | No | Yes | ⊕○○○<br>Very low |          |
| Fasting glucose                                                                        | Xu        | 2014 | RCT | Serious | Very serious | Not serious | Very serious | Undetected         | No | No | No  | ⊕○○○<br>Very low |          |
| Fasting insulin                                                                        | Xu        | 2014 | RCT | Serious | Very serious | Not serious | Very serious | Undetected         | No | No | No  | ⊕○○○<br>Very low |          |
| Fatal myocardial infarction                                                            | Loffredo  | 2015 | RCT | Serious | Not serious  | Not serious | Not serious  | Strongly suspected | No | No | No  | ⊕⊕○○<br>Low      |          |
| HbA1c                                                                                  | Xu        | 2014 | RCT | Serious | Very serious | Not serious | Very serious | Undetected         | No | No | No  | ⊕○○○<br>Very low |          |
| High-density lipoprotein cholesterol (HDL-C) levels in patients with diabetes mellitus | Mohammad  | 2021 | RCT | Serious | Very serious | Not serious | Very serious | Undetected         | No | No | No  | ⊕○○○<br>Very low |          |
| Lipid peroxidation(malondialdehyde)                                                    | Stepanyan | 2014 | RCT | Serious | Serious      | Not serious | Very serious | Undetected         | No | No | No  | ⊕○○○<br>Very low |          |
| Low-density lipoprotein cholesterol (LDL- C) levels in patients with diabetes mellitus | Mohammad  | 2021 | RCT | Serious | Very serious | Not serious | Very serious | Undetected         | No | No | No  | ⊕○○○<br>Very low |          |
| Mean arterial pressure                                                                 | Emami     | 2019 | RCT | Serious | Very serious | Not serious | Very serious | Undetected         | No | No | No  | ⊕○○○<br>Very low |          |
| Muscle damage(creatine                                                                 | Stepanyan | 2014 | RCT | Serious | Serious      | Not serious | Very serious | Undetected         | No | No | No  | ⊕○○○             |          |

|                                                                                       |          |      |                      |         |              |             |              |                    |    |    |    |    |                  |
|---------------------------------------------------------------------------------------|----------|------|----------------------|---------|--------------|-------------|--------------|--------------------|----|----|----|----|------------------|
| kinase)                                                                               |          |      |                      |         |              |             |              |                    |    |    |    |    | Very low         |
| Myocardial infarction                                                                 | Loffredo | 2015 | RCT                  | Serious | Very serious | Not serious | Not serious  | Strongly suspected | No | No | No | No | ⊕○○○<br>Very low |
| Non fatal myocardial infarction                                                       | Loffredo | 2015 | RCT                  | Serious | Very serious | Not serious | Serious      | Undetected         | No | No | No | No | ⊕○○○<br>Very low |
| Ovarian cancer                                                                        | Leng     | 2019 | Cohort, Case-control | Serious | Very serious | Not serious | Serious      | Undetected         | No | No | No | No | ⊕○○○<br>Very low |
| Patients Receiving Hemodialysis: Biomarkers of Endothelial Dysfunction-ICAM-1         | Nguyen   | 2021 | RCT                  | Serious | Very serious | Not serious | Very serious | Undetected         | No | No | No | No | ⊕○○○<br>Very low |
| Patients Receiving Hemodialysis: Biomarkers of Endothelial Dysfunction-VCAM-1         | Nguyen   | 2021 | RCT                  | Serious | Very serious | Not serious | Very serious | Undetected         | No | No | No | No | ⊕○○○<br>Very low |
| Patients Receiving Hemodialysis: Biomarkers of inflammation-CRP                       | Nguyen   | 2021 | RCT                  | Serious | Very serious | Not serious | Very serious | Undetected         | No | No | No | No | ⊕○○○<br>Very low |
| Patients Receiving Hemodialysis: Biomarkers of inflammation-IL-6                      | Nguyen   | 2021 | RCT                  | Serious | Serious      | Not serious | Very serious | Undetected         | No | No | No | No | ⊕○○○<br>Very low |
| Patients Receiving Hemodialysis: Biomarkers of Oxidative Stress-malondialdehyde (MDA) | Nguyen   | 2021 | RCT                  | Serious | Very serious | Not serious | Very serious | Strongly suspected | No | No | No | No | ⊕○○○<br>Very low |
| Pediatric Nonalcoholic Fatty Liver Disease                                            | Sarkhy   | 2014 | RCT                  | Serious | Not serious  | Not serious | Serious      | Undetected         | No | No | No | No | ⊕⊕○○<br>Low      |
| Risk of Alzheimer’s disease (AD)                                                      | Wang     | 2021 | Cohort               | Serious | Very serious | Not serious | Serious      | Undetected         | No | No | No | No | ⊕○○○<br>Very low |
| Serum CRP concentrations                                                              | Asbaghi  | 2020 | RCT                  | Serious | Very serious | Not serious | Very serious | Undetected         | No | No | No | No | ⊕○○○<br>Very low |

|                                                                  |           |      |                                       |         |              |             |              |                    |    |    |     |                  |
|------------------------------------------------------------------|-----------|------|---------------------------------------|---------|--------------|-------------|--------------|--------------------|----|----|-----|------------------|
| Serum IL-6 concentrations                                        | Asbaghi   | 2020 | RCT                                   | Serious | Very serious | Not serious | Very serious | Undetected         | No | No | No  | ⊕○○○<br>Very low |
| Serum TNF- $\alpha$ concentrations                               | Asbaghi   | 2020 | RCT                                   | Serious | Very serious | Not serious | Very serious | Undetected         | No | No | Yes | ⊕○○○<br>Very low |
| Severity of mastalgia                                            | Hajizadeh | 2019 | RCT                                   | Serious | Very serious | Not serious | Very serious | Undetected         | No | No | No  | ⊕○○○<br>Very low |
| Stroke                                                           | Loh       | 2020 | RCT                                   | Serious | Not serious  | Not serious | Serious      | Undetected         | No | No | No  | ⊕⊕○○<br>Low      |
| Systolic blood pressure                                          | Emami     | 2019 | RCT                                   | Serious | Very serious | Not serious | Very serious | Undetected         | No | No | No  | ⊕○○○<br>Very low |
| Total cholesterol (TC) levels in patients with diabetes mellitus | Mohammad  | 2021 | RCT                                   | Serious | Very serious | Not serious | Very serious | Undetected         | No | No | No  | ⊕○○○<br>Very low |
| Triglyceride (TG) levels in patients with diabetes mellitus      | Mohammad  | 2021 | RCT                                   | Serious | Very serious | Not serious | Very serious | Undetected         | No | No | No  | ⊕○○○<br>Very low |
| Waist circumference (WC)                                         | Emami     | 2021 | RCT                                   | Serious | Not serious  | Not serious | Very serious | Strongly suspected | No | No | Yes | ⊕○○○<br>Very low |
| Weight                                                           | Emami     | 2021 | RCT                                   | Serious | Not serious  | Not serious | Very serious | Undetected         | No | No | Yes | ⊕⊕○○<br>Low      |
| Dietary vitamin E                                                |           |      |                                       |         |              |             |              |                    |    |    |     |                  |
| Age-related cataract                                             | Zhang     | 2015 | Cohort, Case–control, Cross-sectional | Serious | Very serious | Not serious | Serious      | Undetected         | No | No | Yes | ⊕○○○<br>Very low |
| Bladder cancer                                                   | Chen      | 2015 | Cohort, Case–control                  | Serious | Not serious  | Not serious | Serious      | Strongly suspected | No | No | Yes | ⊕⊕○○<br>Low      |
| Cervical cancer                                                  | Hu        | 2017 | Case–control                          | Serious | Very serious | Not serious | Not serious  | Undetected         | No | No | No  | ⊕○○○<br>Very low |
| CIN, cervical intraepithelial neoplasia                          | Hu        | 2017 | Case–control                          | Serious | Very serious | Not serious | Not serious  | Undetected         | No | No | No  | ⊕○○○<br>Very low |
| Esophageal Cancer                                                | Cui       | 2018 | Cohort, Case–control                  | Serious | Very serious | Not serious | Serious      | Strongly suspected | No | No | Yes | ⊕○○○<br>Very low |

|                                         |         |      |                                          |         |              |             |              |                    |    |    |     |                  |
|-----------------------------------------|---------|------|------------------------------------------|---------|--------------|-------------|--------------|--------------------|----|----|-----|------------------|
| Kidney Cancer                           | Shen    | 2015 | Cohort, Case–control                     | Serious | Very serious | Not serious | Serious      | Undetected         | No | No | No  | ⊕○○○<br>Very low |
| Lung cancer                             | Zhu     | 2017 | Cohort                                   | Serious | Very serious | Not serious | Serious      | Undetected         | No | No | Yes | ⊕○○○<br>Very low |
| Ovarian cancer                          | Leng    | 2019 | Cohort, Case–control                     | Serious | Very serious | Not serious | Serious      | Undetected         | No | No | No  | ⊕○○○<br>Very low |
| Parkinson's disease                     | Etminan | 2005 | Cohort, Case–control,<br>Cross-sectional | Serious | Not serious  | Not serious | Very serious | Undetected         | No | No | No  | ⊕○○○<br>Very low |
| Total vitamin E                         |         |      |                                          |         |              |             |              |                    |    |    |     |                  |
| Age-related cataract                    | Zhang   | 2015 | Cohort, Case–control                     | Serious | Serious      | Not serious | Serious      | Undetected         | No | No | No  | ⊕○○○<br>Very low |
| Bladder cancer                          | Chen    | 2015 | Cohort, Case–control                     | Serious | Serious      | Not serious | Very serious | Undetected         | No | No | No  | ⊕○○○<br>Very low |
| Glioma                                  | Qin     | 2014 | Cohort, Case–control                     | Serious | Very serious | Not serious | Very serious | Undetected         | No | No | No  | ⊕○○○<br>Very low |
| Ovarian cancer                          | Leng    | 2019 | Cohort, Case–control                     | Serious | Very serious | Not serious | Serious      | Undetected         | No | No | No  | ⊕○○○<br>Very low |
| Pancreatic Cancer                       | Peng    | 2015 | Cohort, Case–control                     | Serious | Not serious  | Not serious | Serious      | Strongly suspected | No | No | No  | ⊕○○○<br>Very low |
| Circulating $\alpha$ -tocopherol levels |         |      |                                          |         |              |             |              |                    |    |    |     |                  |
| Age-related cataract                    | Zhang   | 2015 | Cohort, Case–control,<br>Cross-sectional | Serious | Very serious | Not serious | Serious      | Strongly suspected | No | No | No  | ⊕○○○<br>Very low |
| Asthma or wheeze in children            | Wu      | 2018 | Cohort                                   | Serious | Not serious  | Not serious | Serious      | Strongly suspected | No | No | No  | ⊕○○○<br>Very low |
| Bladder cancer                          | Chen    | 2015 | Cohort, Case–control                     | Serious | Not serious  | Not serious | Very serious | Undetected         | No | No | Yes | ⊕⊕○○<br>Low      |
| Cardiovascular mortality                | Jayedi  | 2019 | Cohort                                   | Serious | Not serious  | Not serious | Very serious | Undetected         | No | No | No  | ⊕○○○             |

|                   |      |      |                      |         |              |             |              |                    |    |    |     |                  |
|-------------------|------|------|----------------------|---------|--------------|-------------|--------------|--------------------|----|----|-----|------------------|
|                   |      |      |                      |         |              |             |              |                    |    |    |     | Very low         |
| Colorectal cancer | Dong | 2017 | Case-control         | Serious | Very serious | Not serious | Very serious | Undetected         | No | No | No  | ⊕○○○<br>Very low |
| CVD               | Li   | 2016 | Cohort, Case-control | Serious | Very serious | Not serious | Very serious | Undetected         | No | No | No  | ⊕○○○<br>Very low |
| Prostate cancer   | Cui  | 2014 | Case-control         | Serious | Not serious  | Not serious | Very serious | Strongly suspected | No | No | Yes | ⊕○○○<br>Very low |
