# Supplementary material for: Vitamin E and Multiple Health Outcomes: An Umbrella Review of Meta-Analyses
Source: MDPI journal article supplement (doi:10.3390/nu15153301), 2023-07-25
Supplement: s1 [file s1]

**Supplementary Table S2. Summary of evidence classification for meta-analyses.**

| <b>Evidence</b>       | <b>Criteria</b>                                                                                                                                                                                                                                                                                                                                                                                                                                                                    |
|-----------------------|------------------------------------------------------------------------------------------------------------------------------------------------------------------------------------------------------------------------------------------------------------------------------------------------------------------------------------------------------------------------------------------------------------------------------------------------------------------------------------|
| I, Consistent         | <ul style="list-style-type: none"><li>• &gt;1000 Cases</li><li>• <math>P &lt; 1 \times 10^{-6}</math></li><li>• 95% prediction interval excludes null</li><li>• The largest original study reporting a statistically significant result (<math>P &lt; 0.05</math>)</li><li>• No large heterogeneity (<math>I^2 &lt; 50\%</math>)</li><li>• No evidence of small-study effect (<math>P &gt; 0.10</math>)</li><li>• No excess significance bias (<math>P &gt; 0.10</math>)</li></ul> |
| II, Highly suggestive | <ul style="list-style-type: none"><li>• &gt;1000 Cases</li><li>• <math>P &lt; 1 \times 10^{-6}</math></li><li>• The largest original study reporting a statistically significant result (<math>P &lt; 0.05</math>)</li></ul>                                                                                                                                                                                                                                                       |
| III, Suggestive       | <ul style="list-style-type: none"><li>• &gt;1000 Cases</li><li>• <math>p &lt; 1 \times 10^{-3}</math></li></ul>                                                                                                                                                                                                                                                                                                                                                                    |
| IV, Weak              | <ul style="list-style-type: none"><li>• Remaining <math>p &lt; 0.05</math></li></ul>                                                                                                                                                                                                                                                                                                                                                                                               |
| V, Not significant    | <ul style="list-style-type: none"><li>• <math>p \geq 0.05</math></li></ul>                                                                                                                                                                                                                                                                                                                                                                                                         |
