# Supplementary material for: Vitamin E and Multiple Health Outcomes: An Umbrella Review of Meta-Analyses
Source: MDPI journal article supplement (doi:10.3390/nu15153301), 2023-07-25
Supplement: s1 [file s1]

**Supplementary Table S3. The list of excluded meta-analyses by full text screening with exclusion reason.**

| <b>Author, year</b>                       | <b>Reason for exclusion</b>                                                                  |
|-------------------------------------------|----------------------------------------------------------------------------------------------|
| Xu R, et al. 2015 <sup>1</sup>            | Another meta-analysis studying the same association was chosen as the eligible meta-analysis |
| Cheng P, et al. 2018 <sup>2</sup>         | Another meta-analysis studying the same association was chosen as the eligible meta-analysis |
| Shrestha D S M, et al. 2013 <sup>3</sup>  | Another meta-analysis studying the same association was chosen as the eligible meta-analysis |
| Shang Y, et al. 2015 <sup>4</sup>         | Another meta-analysis studying the same association was chosen as the eligible meta-analysis |
| Schürks M, et al. 2010 <sup>5</sup>       | Another meta-analysis studying the same association was chosen as the eligible meta-analysis |
| Sato K, et al. 2015 <sup>6</sup>          | Another meta-analysis studying the same association was chosen as the eligible meta-analysis |
| Reyes R R P, et al. 2012 <sup>7</sup>     | Another meta-analysis studying the same association was chosen as the eligible meta-analysis |
| Saboori, et al. 2015 <sup>8</sup>         | Another meta-analysis studying the same association was chosen as the eligible meta-analysis |
| Miao H, et al. 2021 <sup>9</sup>          | Another meta-analysis studying the same association was chosen as the eligible meta-analysis |
| Li F J, et al. 2012 <sup>10</sup>         | Another meta-analysis studying the same association was chosen as the eligible meta-analysis |
| Ji H F, et al. 2014 <sup>11</sup>         | Another meta-analysis studying the same association was chosen as the eligible meta-analysis |
| Irani M, et al. 2020 <sup>12</sup>        | Another meta-analysis studying the same association was chosen as the eligible meta-analysis |
| Huang H, et al. 2016 <sup>13</sup>        | Another meta-analysis studying the same association was chosen as the eligible meta-analysis |
| Eum S, et al. 2013 <sup>14</sup>          | Another meta-analysis studying the same association was chosen as the eligible meta-analysis |
| Dong Y, et al. 2018 <sup>15</sup>         | Another meta-analysis studying the same association was chosen as the eligible meta-analysis |
| Dong R, et al. 2018 <sup>16</sup>         | Another meta-analysis studying the same association was chosen as the eligible meta-analysis |
| Cheng P, et al. 2018 <sup>17</sup>        | Another meta-analysis studying the same association was chosen as the eligible meta-analysis |
| Chen G, et al. 2015 <sup>18</sup>         | Another meta-analysis studying the same association was chosen as the eligible meta-analysis |
| Chen F, et al. 2015 <sup>19</sup>         | Another meta-analysis studying the same association was chosen as the eligible meta-analysis |
| Bin Q, et al. 2011 <sup>20</sup>          | Another meta-analysis studying the same association was chosen as the eligible meta-analysis |
| Amanullah I, et al. 2019 <sup>21</sup>    | Another meta-analysis studying the same association was chosen as the eligible meta-analysis |
| Alkhenizan A H, et al. 2004 <sup>22</sup> | Another meta-analysis studying the same association was chosen as the eligible meta-analysis |

|                                              |                                                                                              |
|----------------------------------------------|----------------------------------------------------------------------------------------------|
| Abdel-Maboud M, et al. 2020 <sup>23</sup>    | Another meta-analysis studying the same association was chosen as the eligible meta-analysis |
| Schürks M, et al. 2010 <sup>24</sup>         | Another meta-analysis studying the same association was chosen as the eligible meta-analysis |
| Zhang Z, et al. 2020 <sup>25</sup>           | Effects of Vitamin E and Combination with Other Substances on Health Outcomes                |
| Zhang J, et al. 2021 <sup>26</sup>           | Effects of Vitamin E and Combination with Other Substances on Health Outcomes                |
| Sepidarkish M, et al. 2019 <sup>27</sup>     | Effects of Vitamin E and Combination with Other Substances on Health Outcomes                |
| Moosavian S P, et al. 2019 <sup>28</sup>     | Effects of Vitamin E and Combination with Other Substances on Health Outcomes                |
| Jiang S, et al. 2014 <sup>29</sup>           | Effects of Vitamin E and Combination with Other Substances on Health Outcomes                |
| Derakhshandeh S M, et al. 2020 <sup>30</sup> | Effects of Vitamin E and Combination with Other Substances on Health Outcomes                |
| Dehbalaei M G, et al. 2021 <sup>31</sup>     | Effects of Vitamin E and Combination with Other Substances on Health Outcomes                |
| Chaitanya N C, et al. 2017 <sup>32</sup>     | Effects of Vitamin E and Combination with Other Substances on Health Outcomes                |
| Bjelakovic G, et al. 2013 <sup>33</sup>      | Effects of Vitamin E and Combination with Other Substances on Health Outcomes                |
| Asbaghi O, et al. 2020 <sup>34</sup>         | Effects of Vitamin E and Combination with Other Substances on Health Outcomes                |
| Asbaghi O, et al. 2019 <sup>35</sup>         | Effects of Vitamin E and Combination with Other Substances on Health Outcomes                |
| Yang S K, et al. 2014 <sup>36</sup>          | Not related to health outcomes                                                               |
| Li Z, et al. 2021 <sup>37</sup>              | Not related to health outcomes                                                               |
| Sahebkar A, et al. 2015 <sup>38</sup>        | Not related to health outcomes                                                               |
| Oliver C J, et al. 2017 <sup>39</sup>        | Not related to health outcomes                                                               |
| Moghimi-K M H, et al. 2020 <sup>40</sup>     | Not related to health outcomes                                                               |
| Huang J, et al. 2015 <sup>41</sup>           | Not related to health outcomes                                                               |
| Wyatt M C, et al. 2020 <sup>42</sup>         | Not related to health outcomes                                                               |
| D'Arrigo G, et al. 2017 <sup>43</sup>        | Not related to health outcomes                                                               |
| Curtis A J, et al. 2014 <sup>44</sup>        | Not related to health outcomes                                                               |
| Bourne N, et al. 2007 <sup>45</sup>          | Not related to health outcomes                                                               |
| Asleh R, et al. 2018 <sup>46</sup>           | Not related to health outcomes                                                               |
| Baggetta R, et al. 2016 <sup>47</sup>        | Not related to health outcomes                                                               |
| Yale S L, et al. 2005 <sup>48</sup>          | Not meta-analysis                                                                            |

|                                            |                                                                                              |
|--------------------------------------------|----------------------------------------------------------------------------------------------|
| Vardi M, et al. 2012 <sup>49</sup>         | Not meta-analysis                                                                            |
| Trefan L, et al. 2011 <sup>50</sup>        | Not meta-analysis                                                                            |
| Shelton R J, et al. 2005 <sup>51</sup>     | Not meta-analysis                                                                            |
| Alkhenizan A, et al. 2007 <sup>52</sup>    | Provided insufficient data for quantitative synthesis                                        |
| Barak Y, et al. 1998 <sup>53</sup>         | Provided insufficient data for quantitative synthesis                                        |
| JianHai L, et al. 2019 <sup>54</sup>       | Full text could not be retrieved                                                             |
| Alcantara M J E, et al. 2020 <sup>55</sup> | Full text could not be retrieved                                                             |
| Rad E Y, et al. 2018 <sup>56</sup>         | Full text could not be retrieved                                                             |
| Kumar, et al. 2013 <sup>57</sup>           | Another meta-analysis studying the same association was chosen as the eligible meta-analysis |

#### **References of the excluded meta-analyses by full text screening**

<sup>1</sup> Xu R, Tao A, Zhang S, et al. Association between vitamin E and non-alcoholic steatohepatitis: a meta-analysis[J]. International Journal of Clinical and experimental medicine, 2015, 8(3): 3924.

<sup>2</sup> Cheng P, Wang L, Ning S, et al. Vitamin E intake and risk of stroke: a meta-analysis[J]. British Journal of Nutrition, 2018, 120(10): 1181-1188.

<sup>3</sup> Shrestha D S M, Rijal R, Shreshtha M, et al. Vitamin e in the treatment of NAFLD: Systematic review and metaanalysis[C]//JOURNAL OF GASTROENTEROLOGY AND HEPATOLOGY. 111 RIVER ST, HOBOKEN 07030-5774, NJ USA: WILEY-BLACKWELL, 2013, 28: 191-191.

<sup>4</sup> Shang Y, Yi S, Cui D, et al. Vitamin E Intake and Risk of Renal Cell Carcinoma: A Meta-Analysis of 7 Case – Control Studies[J]. Journal of Renal Nutrition, 2015, 25(4): 339-344.

<sup>5</sup> Schürks M, Glynn R J, Rist P M, et al. Effects of vitamin E on stroke subtypes: meta-analysis of randomised controlled trials[J]. Bmj, 2010, 341.

<sup>6</sup> Sato K, Gosho M, Yamamoto T, et al. Vitamin E has a beneficial effect on nonalcoholic fatty liver disease: a meta-analysis of randomized controlled trials[J]. Nutrition, 2015, 31(7-8): 923-930.

- 
- <sup>7</sup> Reyes R R P, Rhea Reyes R, Rhea Reyes R, et al. Efficacy of Vitamin E Supplementation in Cisplatin-Induced Neuropathy: A Meta-Analysis of Randomized Controlled Trials[C]//ANNALS OF NEUROLOGY. 111 RIVER ST, HOBOKEN 07030-5774, NJ USA: WILEY-BLACKWELL, 2012, 72: S36-S36.
- <sup>8</sup> Saboori S, Shab-Bidar S, Speakman J R, et al. Effect of vitamin E supplementation on serum C-reactive protein level: a meta-analysis of randomized controlled trials[J]. European journal of clinical nutrition, 2015, 69(8): 867-873.
- <sup>9</sup> Miao H, Li R, Chen D, et al. Protective effects of vitamin E on chemotherapy-induced peripheral neuropathy: a meta-analysis of randomized controlled trials[J]. Annals of Nutrition and Metabolism, 2021, 77(3): 127-137.
- <sup>10</sup> Li F J, Shen L, Ji H F. Dietary intakes of vitamin E, vitamin C, and  $\beta$ -carotene and risk of Alzheimer's disease: a meta-analysis[J]. Journal of Alzheimer's disease, 2012, 31(2): 253-258.
- <sup>11</sup> Ji H F, Sun Y, Shen L. Effect of vitamin E supplementation on aminotransferase levels in patients with NAFLD, NASH, and CHC: results from a meta-analysis[J]. Nutrition, 2014, 30(9): 986-991.
- <sup>12</sup> Irani M, Sheidaei S, Ghazanfarpour M, et al. Comparative evaluation of evening primrose oil and vitamin E on the severity of cyclic Mastalgia: A Systematic Review and Meta-Analysis[J]. Iranian Journal of Obstetrics, Gynecology and Infertility, 2020, 23(3): 91-98.
- <sup>13</sup> Huang H, He M, Liu L, et al. Vitamin E does not decrease the incidence of chemotherapy-induced peripheral neuropathy: a meta-analysis[J]. Contemporary Oncology, 2016, 20(3): 237.
- <sup>14</sup> Eum S, Choi H D, Chang M J, et al. Protective effects of vitamin E on chemotherapy-induced peripheral neuropathy: a meta-analysis of randomized controlled trials[J]. Int J Vitam Nutr Res, 2013, 83(2): 101-111.
- <sup>15</sup> Dong Y, Chen X, Liu Y, et al. Do low - serum vitamin E levels increase the risk of Alzheimer disease in older people? Evidence from a meta - analysis of case - control studies[J]. International journal of geriatric psychiatry, 2018, 33(2): e257-e263.
- <sup>16</sup> Dong R, Yang Q, Zhang Y, et al. Meta-analysis of vitamin C, vitamin E and  $\beta$ -carotene levels in the plasma of Alzheimer's disease patients[J]. Wei Sheng yan jiu= Journal of Hygiene Research, 2018, 47(4): 648-654.

- 
- <sup>17</sup> Cheng P, Wang L, Ning S, et al. Vitamin E intake and risk of stroke: a meta-analysis[J]. British Journal of Nutrition, 2018, 120(10): 1181-1188.
- <sup>18</sup> Chen G, Wang J, Hong X, et al. Dietary vitamin E intake could reduce the risk of lung cancer: evidence from a meta-analysis[J]. International journal of clinical and experimental medicine, 2015, 8(4): 6631.
- <sup>19</sup> Chen F, Li Q, Yu Y, et al. Association of vitamin C, vitamin D, vitamin E and risk of bladder cancer: a dose-response meta-analysis[J]. Scientific reports, 2015, 5(1): 1-7.
- <sup>20</sup> Bin Q, Hu X, Cao Y, et al. The role of vitamin E (tocopherol) supplementation in the prevention of stroke[J]. Thrombosis and haemostasis, 2011, 105(04): 579-585.
- <sup>21</sup> Amanullah I, Khan Y H, Anwar I, et al. Effect of vitamin E in non-alcoholic fatty liver disease: a systematic review and meta-analysis of randomised controlled trials[J]. Postgraduate Medical Journal, 2019, 95(1129): 601-611.
- <sup>22</sup> Alkhenizan A H, Al-Omran M A. The role of vitamin E in the prevention of coronary events and stroke. Meta-analysis of randomized controlled trials[J]. Saudi medical journal, 2004, 25(12): 1808-1814.
- <sup>23</sup> Abdel-Maboud M, Menshawy A, Menshawy E, et al. The efficacy of vitamin E in reducing non-alcoholic fatty liver disease: a systematic review, meta-analysis, and meta-regression[J]. Therapeutic advances in gastroenterology, 2020, 13: 1756284820974917.
- <sup>24</sup> Schürks M, Glynn R J, Rist P M, et al. Effects of vitamin E on stroke subtypes: meta-analysis of randomised controlled trials[J]. Bmj, 2010, 341.
- <sup>25</sup> Zhang Z, Xiao W, Jia J, et al. RETRACTED: the effect of combined application of pentoxifylline and vitamin E for the treatment of osteoradionecrosis of the jaws: a meta-analysis[J]. Oral Surgery, Oral Medicine, Oral Pathology and Oral Radiology, 2020, 129(3): 207-214.
- <sup>26</sup> Zhang J, Xing C, Zhao H, et al. The effectiveness of coenzyme Q10, vitamin E, inositols, and vitamin D in improving the endocrine and metabolic profiles in women with polycystic ovary syndrome: a network Meta-analysis[J]. Gynecological Endocrinology, 2021, 37(12): 1063-1071.

- 
- <sup>27</sup> Sepidarkish M, Morvaridzadeh M, Akbari-Fakhrabadi M, et al. Effect of omega-3 fatty acid plus vitamin E Co-Supplementation on lipid profile: A systematic review and meta-analysis[J]. *Diabetes & Metabolic Syndrome: Clinical Research & Reviews*, 2019, 13(2): 1649-1656.
- <sup>28</sup> Moosavian S P, Arab A, Mehrabani S, et al. The effect of omega-3 and vitamin E on oxidative stress and inflammation: Systematic review and meta-analysis of randomized controlled trials[J]. *International Journal for Vitamin and Nutrition Research*, 2019.
- <sup>29</sup> Jiang S, Pan Z, Li H, et al. Meta-analysis: low-dose intake of vitamin E combined with other vitamins or minerals may decrease all-cause mortality[J]. *Journal of nutritional science and vitaminology*, 2014, 60(3): 194-205.
- <sup>30</sup> Derakhshandeh-Rishehri S M, Heidari-Beni M, Eftekhari M H. THE EFFECTS OF REALSIL (SILYBIN – PHOSPHOLIPID – VITAMIN E COMPLEX) ON LIVER ENZYMES IN PATIENTS WITH NON-ALCOHOLIC FATTY LIVER DISEASE (NAFLD) OR NON-ALCOHOLIC STEATO-HEPATITIS (NASH): A SYSTEMATIC REVIEW AND META-ANALYSIS OF RCTS[J]. *Acta Endocrinologica (Bucharest)*, 2020, 16(2): 223.
- <sup>31</sup> Dehbalaei M G, Ashtary-Larky D, Mesrkanlou H A, et al. The effects of magnesium and vitamin E co-supplementation on some cardiovascular risk factors: A meta-analysis[J]. *Clinical Nutrition ESPEN*, 2021, 41: 110-117.
- <sup>32</sup> Chaitanya N C, Muthukrishnan A, Babu D B G, et al. Role of vitamin E and vitamin a in oral mucositis induced by cancer chemo/radiotherapy-a meta-analysis[J]. *Journal of clinical and diagnostic research: JCDR*, 2017, 11(5): ZE06.
- <sup>33</sup> Bjelakovic G, Nikolova D, Gluud C. Meta-regression analyses, meta-analyses, and trial sequential analyses of the effects of supplementation with beta-carotene, vitamin A, and vitamin E singly or in different combinations on all-cause mortality: do we have evidence for lack of harm?[J]. *PloS one*, 2013, 8(9): e74558.
- <sup>34</sup> Asbaghi O, Saboori S, Falahi E, et al. The effect of omega-3 fatty acids and vitamin E co-supplementation on glycemic profile: A systematic review and meta-analysis of randomized controlled trials[J]. *Obesity Medicine*, 2020, 17: 100180.
- <sup>35</sup> Asbaghi O, Choghakhori R, Abbasnezhad A. Effect of Omega-3 and vitamin E co-supplementation on serum lipids concentrations in overweight patients with metabolic disorders: A systematic review and meta-analysis of randomized controlled trials[J]. *Diabetes & Metabolic Syndrome: Clinical Research & Reviews*, 2019, 13(4): 2525-2531.

- 
- <sup>36</sup> Yang S K, Xiao L, Xu B, et al. Effects of vitamin E-coated dialyzer on oxidative stress and inflammation status in hemodialysis patients: a systematic review and meta-analysis[J]. *Renal failure*, 2014, 36(5): 722-731.
- <sup>37</sup> Li Z, Xiang S, Wu C, et al. Vitamin E highly cross-linked polyethylene reduces mid-term wear in primary total hip replacement: a meta-analysis and systematic review of randomized clinical trials using radiostereometric analysis[J]. *EFORT open reviews*, 2021, 6(9): 759-770.
- <sup>38</sup> Sahebkar A, Simental-Mendia L E, Ferretti G, et al. Statin therapy and plasma vitamin E concentrations: A systematic review and meta-analysis of randomized placebo-controlled trials[J]. *Atherosclerosis*, 2015, 243(2): 579-588.
- <sup>39</sup> Oliver C J, Myers S P. Validity of a Cochrane Systematic Review and meta-analysis for determining the safety of vitamin E[J]. *BMC complementary and alternative medicine*, 2017, 17(1): 1-8.
- <sup>40</sup> Moghimi-Kandelousi M H, Alamouti A A, Imani M, et al. A meta-analysis and meta-regression of the effects of vitamin E supplementation on serum enrichment, udder health, milk yield, and reproductive performance of transition cows[J]. *Journal of dairy science*, 2020, 103(7): 6157-6166.
- <sup>41</sup> Huang J, Yi B, Li A, et al. Effects of vitamin E-coated dialysis membranes on anemia, nutrition and dyslipidemia status in hemodialysis patients: a meta-analysis[J]. *Renal failure*, 2015, 37(3): 398-407.
- <sup>42</sup> Wyatt M C, Robertson A, Foxall-Smi M, et al. Does vitamin E highly-crosslinked polyethylene convey an advantage in primary total hip replacement? A systematic review and meta-analysis[J]. *Hip International*, 2020, 30(5): 598-608.
- <sup>43</sup> D'Arrigo G, Baggetta R, Tripepi G, et al. Effects of vitamin E-coated versus conventional membranes in chronic hemodialysis patients: a systematic review and meta-analysis[J]. *Blood Purification*, 2017, 43(1-3): 101-122.
- <sup>44</sup> Curtis A J, Bullen M, Piccenna L, et al. Vitamin E supplementation and mortality in healthy people: a meta-analysis of randomised controlled trials[J]. *Cardiovascular drugs and therapy*, 2014, 28(6): 563-573.
- <sup>45</sup> Bourne N, Laven R, Wathes D C, et al. A meta-analysis of the effects of Vitamin E supplementation on the incidence of retained foetal membranes in dairy cows[J]. *Theriogenology*, 2007, 67(3): 494-501.

- 
- <sup>46</sup> Asleh R, Briasoulis A, Berinstein E M, et al. Meta-analysis of the association of the haptoglobin genotype with cardiovascular outcomes and the pharmacogenomic interactions with vitamin E supplementation[J]. *Pharmacogenomics and personalized medicine*, 2018, 11: 71.
- <sup>47</sup> Baggetta R, D'Arrigo G, Galli F, et al. BENEFITS OF VITAMIN E-COATED VERSUS CONVENTIONAL MEMBRANES IN CHRONIC HAEMODIALYSIS PATIENTS: A SYSTEMATIC REVIEW & META-ANALYSIS[C]//*NEPHROLOGY DIALYSIS TRANSPLANTATION*. GREAT CLARENDON ST, OXFORD OX2 6DP, ENGLAND: OXFORD UNIV PRESS, 2016, 31: 304-305.
- <sup>48</sup> Yale S L. The Vitamin E Meta-Analysis: Cause for Concern?[J]. *Alternative & Complementary Therapies*, 2005, 11(1): 7-11.
- <sup>49</sup> Vardi M, Blum S, Levy A P. Haptoglobin genotype and cardiovascular outcomes in diabetes mellitus—natural history of the disease and the effect of vitamin E treatment. Meta-analysis of the medical literature[J]. *European Journal of Internal Medicine*, 2012, 23(7): 628-632.
- <sup>50</sup> Trefan L, Bünger L, Bloom-Hansen J, et al. Meta-analysis of the effects of dietary vitamin E supplementation on  $\alpha$ -tocopherol concentration and lipid oxidation in pork[J]. *Meat Science*, 2011, 87(4): 305-314.
- <sup>51</sup> Shelton R J, Velavan P, Nikitin N P, et al. Clinical trials update from the American Heart Association meeting: ACORN - CSD, primary care trial of chronic disease management, PEACE, CREATE, SHIELD, A - HeFT, GEMINI, vitamin E meta - analysis, ESCAPE, CARP, and SCD - HeFT cost - effectiveness study[J]. *European journal of heart failure*, 2005, 7(1): 127-135.
- <sup>52</sup> Alkhenizan A, Hafez K. The role of vitamin E in the prevention of cancer: a meta-analysis of randomized controlled trials[J]. *Annals of Saudi medicine*, 2007, 27(6): 409-414.
- <sup>53</sup> Barak Y, Swartz M, Shamir E, et al. Vitamin E ( $\alpha$ -tocopherol) in the treatment of tardive dyskinesia: a statistical meta-analysis[J]. *Annals of clinical psychiatry*, 1998, 10(3): 101-105.
- <sup>54</sup> JianHai L, ShaoJun C, Huan L, et al. Vitamin E consumption and the risk of bladder cancer: a meta-analysis of prospective studies[J]. *International Journal for Vitamin and Nutrition Research*, 2019, 89(3/4): 168-175.
- <sup>55</sup> Alcantara M J E, Pandey J G P, Sebastian M R C. 338P Vitamin E in the treatment of chemotherapy and radiation-induced mucositis: A meta-analysis of randomized controlled trials[J]. *Annals of Oncology*, 2020, 31: S1372-S1373.

---

<sup>56</sup> Rad E Y, Falahi E, Djalali M, et al. Effect of vitamin E supplementation on plasma and urine levels of isoprostane F2  $\alpha$  in randomized controlled clinical trials: a systematic review and meta-analysis[J]. International Journal for Vitamin and Nutrition Research, 2018.

<sup>57</sup> Kumar S, Benjo A M, Pamidimukala C K, et al. Vitamin C decreases atrial fibrillation in cardiac surgery patients but vitamin e may decrease response: A randomized-controlled trial meta-analysis[J]. 2013.
